# Supplementary material for: Low-Dose Creatine Supplementation May Be Effective in Early-Stage Statin Myopathy: An Observational, Preliminary Study
Source: Preprints.org preprint supplement (doi:10.20944/preprints202409.2116.v1), 2024-09-26
Supplement: Supplementary file 1 [file supplementary]

| CK    | T0  | T2  | T4  |
|-------|-----|-----|-----|
| pt 1  | 221 | 186 | 180 |
| pt 2  | N/A | 51  | 53  |
| pt 3  | 49  | 65  | 66  |
| pt 4  | 345 | 379 | 379 |
| pt 5  | 184 | 171 | 302 |
| pt 6  | 232 | 172 | 167 |
| pt 7  | 220 | 225 | 203 |
| pt 8  | 46  | 94  | 69  |
| pt 9  | 204 | 351 | 306 |
| pt 10 | 147 | 219 | 247 |
| pt 11 | 417 | 628 | 213 |

| Total cholesterol | T0  | T2  | T4  |
|-------------------|-----|-----|-----|
| pt 1              | 242 | 132 | 137 |
| pt 2              | 129 | 147 | 135 |
| pt 3              | 127 | 98  | 109 |
| pt 4              | 141 | 136 | 162 |
| pt 5              | 120 | 105 | 89  |
| pt 6              | 127 | 140 | 148 |
| pt 7              | 108 | 102 | 110 |
| pt 8              | 219 | 202 | 215 |
| pt 9              | 147 | 113 | 126 |
| pt 10             | 177 | 149 | 137 |
| pt 11             | 155 | 158 | 134 |

| LDL-cholesterol | T0  | T2  | T4  |
|-----------------|-----|-----|-----|
| pt 1            | 160 | 62  | 73  |
| pt 2            | 51  | 57  | 57  |
| pt 3            | 71  | 45  | 57  |
| pt 4            | 85  | 87  | 111 |
| pt 5            | 65  | 50  | 44  |
| pt 6            | 61  | 77  | 74  |
| pt 7            | 50  | 50  | 56  |
| pt 8            | 143 | 112 | 134 |
| pt 9            | 108 | 81  | 78  |
| pt 10           | 119 | 84  | 71  |
| pt 11           | 90  | 80  | 87  |

| Serum creatinine | T0   | T1   | T2   | T3   | T4   |
|------------------|------|------|------|------|------|
| pt 1             | 0.55 | 0.63 | 0.62 | 0.59 | 0.59 |
| pt 2             | 0.54 | 0.70 | 0.64 | 0.74 | 0.67 |
| pt 3             | 0.89 | 1.15 | 1.11 | 1.29 | 1.18 |
| pt 4             | 0.93 | 1.16 | 1.14 | 0.98 | 1.12 |
| pt 5             | 1.53 | 1.46 | 1.37 | 1.61 | 1.83 |

|       |      |      |      |      |      |
|-------|------|------|------|------|------|
| pt 6  | 0.80 | 0.84 | 0.88 | 0.85 | 0.78 |
| pt 7  | 1.24 | 1.09 | 1.12 | 1.09 | 1.21 |
| pt 8  | 0.77 | 0.8  | 0.8  | 0.75 | 0.71 |
| pt 9  | 0.89 | 0.82 | 0.98 | 0.90 | 0.94 |
| pt 10 | 0.8  | 0.81 | 0.77 | 0.72 | 0.72 |
| pt 11 | 0.77 | 1    | 1    | 0.88 | 1.10 |

Shewmon and Craig's "myopathy score"

|       | T0 | T1 | T2 | T3 | T4 |
|-------|----|----|----|----|----|
| pt 1  | 16 | 10 | 4  | 11 | 16 |
| pt 2  | 12 | 12 | 13 | 8  | 11 |
| pt 3  | 6  | 4  | 6  | 3  | 2  |
| pt 4  | 4  | 4  | 2  | 0  | 4  |
| pt 5  | 19 | 3  | 11 | 18 | 7  |
| pt 6  | 7  | 3  | 2  | 7  | 4  |
| pt 7  | 7  | 2  | 3  | 4  | 3  |
| pt 8  | 12 | 10 | 8  | 5  | 2  |
| pt 9  | 13 | 1  | 0  | 3  | 0  |
| pt 10 | 11 | 12 | 9  | 3  | 3  |
| pt 11 | 5  | 6  | 12 | 7  | 3  |
